# Supplementary material
Source: PubMed Central journal article supplement (PMC8356145)
Supplement: jama-e2111444-s004.pdf [file jama-e2111444-s004.pdf]

\*Indicates required information. Only first name, last name, and suffix will appear in PubMed.

| <b>*Group Name(s): BASICS Investigators and</b> |                   |                |          |                                                     |                 |                       |                       |
|-------------------------------------------------|-------------------|----------------|----------|-----------------------------------------------------|-----------------|-----------------------|-----------------------|
| <b>*First Name and Middle Initial(s)</b>        | <b>*Last Name</b> | <b>*Suffix</b> | Academic | Institution                                         | Location (city, | Role or Contribution, | Group (if more than 1 |
| Rodrigo                                         | Biondi            |                |          | Instituto de Cardiologia do Distrito Federal        |                 |                       |                       |
| Bruno C. R.                                     | Amaral            |                |          | Instituto de Cardiologia do Distrito Federal        |                 |                       |                       |
| Edvar                                           | Ferreira R.       | Junior         |          | Instituto de Cardiologia do Distrito Federal        |                 |                       |                       |
| Andrea Z.                                       | Abdalla           |                |          | Instituto de Cardiologia do Distrito Federal        |                 |                       |                       |
| Flávio G. R.                                    | de Freitas        |                |          | Hospital SEPACO                                     |                 |                       |                       |
| Nathaly F.                                      | Nunes             |                |          | Hospital SEPACO                                     |                 |                       |                       |
| Rodrigo C.                                      | da Cunha          |                |          | Hospital SEPACO                                     |                 |                       |                       |
| Elijane F.                                      | Alves             |                |          | Hospital SEPACO                                     |                 |                       |                       |
| Rodrigo C.                                      | Figueiredo        |                |          | Hospital São José – UNESC                           |                 |                       |                       |
| Rodrigo B.                                      | Bortolini         |                |          | Hospital São José – UNESC                           |                 |                       |                       |
| Cintia L.                                       | Sartori           |                |          | Hospital São José – UNESC                           |                 |                       |                       |
| Eduardo S.                                      | Marques           |                |          | Hospital São José – UNESC                           |                 |                       |                       |
| Maria A                                         | de Sousa          |                |          | Hospital São Paulo – UNIFESP                        |                 |                       |                       |
| Danieri Y. V.                                   | Tomotani          |                |          | Hospital São Paulo – UNIFESP                        |                 |                       |                       |
| Airton L. O.                                    | Manoel            |                |          | Hospital Paulistano                                 |                 |                       |                       |
| Wilson J.                                       | Lovato            |                |          | Hospital das Clínicas FMUSP Ribeirão Preto          |                 |                       |                       |
| Bruno G.                                        | Dantas            |                |          | Hospital das Clínicas FMUSP Ribeirão Preto          |                 |                       |                       |
| Leonardo C.                                     | Palma             |                |          | Hospital das Clínicas FMUSP Ribeirão Preto          |                 |                       |                       |
| Fábio L.                                        | da Silva          |                |          | Hospital das Clínicas FMUSP Ribeirão Preto          |                 |                       |                       |
| Cristina P.                                     | Amendola          |                |          | Hospital do Câncer de Barretos                      |                 |                       |                       |
| Luciana C.                                      | Sanches           |                |          | Hospital do Câncer de Barretos                      |                 |                       |                       |
| Fernanda A. M.                                  | Scuoteguazza      |                |          | Hospital do Câncer de Barretos                      |                 |                       |                       |
| Ligia Z.                                        | de Britto         |                |          | Hospital do Câncer de Barretos                      |                 |                       |                       |
| Ary                                             | Serpa             | Neto           |          | Hospital Israelita Albert Einstein                  |                 |                       |                       |
| Niklas S.                                       | Campos            |                |          | Hospital Israelita Albert Einstein                  |                 |                       |                       |
| Fabio B.                                        | Hohmann           |                |          | Hospital Israelita Albert Einstein                  |                 |                       |                       |
| Guilherme B.                                    | Olivato           |                |          | Hospital Israelita Albert Einstein                  |                 |                       |                       |
| Jorge L.R.                                      | Paranhos          |                |          | Santa Casa de Misericórdia de São João Del Rei      |                 |                       |                       |
| Iany G.                                         | da Silva          |                |          | Santa Casa de Misericórdia de São João Del Rei      |                 |                       |                       |
| Adilson de C.                                   | Meireles          |                |          | Santa Casa de Misericórdia de São João Del Rei      |                 |                       |                       |
| Viviane C.                                      | Veiga             |                |          | BP - A Beneficência Portuguesa de São Paulo         |                 |                       |                       |
| Juliana C.                                      | Coelho            |                |          | BP - A Beneficência Portuguesa de São Paulo         |                 |                       |                       |
| Maiko M.                                        | Silveira          |                |          | BP - A Beneficência Portuguesa de São Paulo         |                 |                       |                       |
| Agnes C.                                        | Lisboa            |                |          | BP - A Beneficência Portuguesa de São Paulo         |                 |                       |                       |
| Marco A.V.                                      | Guedes            |                |          | Hospital Ana Nery                                   |                 |                       |                       |
| Luiz C.S.                                       | Passos            |                |          | Hospital Ana Nery                                   |                 |                       |                       |
| Daniela C.                                      | Dorta             |                |          | Hospital Ana Nery                                   |                 |                       |                       |
| Ramana A.                                       | Rangel            |                |          | Hospital Ana Nery                                   |                 |                       |                       |
| Péricles                                        | Duarte            |                |          | Hospital do Câncer UOPECCAN                         |                 |                       |                       |
| Eraldo de A.                                    | Lúcio             |                |          | Hospital São Francisco – Santa Casa de Porto Alegre |                 |                       |                       |
| Eduardo B.                                      | Tondo             |                |          | Hospital São Francisco – Santa Casa de Porto Alegre |                 |                       |                       |
| Pablo A.A.                                      | Vaz               |                |          | Hospital São Francisco – Santa Casa de Porto Alegre |                 |                       |                       |
| Paula K.                                        | de Oliveira       |                |          | Hospital São Francisco – Santa Casa de Porto Alegre |                 |                       |                       |
| Lúcio C.                                        | de Oliveira       | Junior         |          | Hospital Geral Cleriston Andrade                    |                 |                       |                       |

\*Indicates required information. Only first name, last name, and suffix will appear in PubMed.

| *First Name and Middle Initial(s) | *Last Name  | *Suffix | Academic | Institution                                      | Location (city, | Role or Contribution, | Group (if more than 1 |
|-----------------------------------|-------------|---------|----------|--------------------------------------------------|-----------------|-----------------------|-----------------------|
| Paulo H.P.                        | Ferreira    |         |          | Hospital Geral Cleriston Andrade                 |                 |                       |                       |
| Patrick H.S.                      | Sampaio     |         |          | Hospital Geral Cleriston Andrade                 |                 |                       |                       |
| Maurício G.S.                     | Serra       |         |          | Hospital Geral Cleriston Andrade                 |                 |                       |                       |
| Thiago C.                         | Lisboa      |         |          | Hospital Santa Rita – Santa Casa de Porto Alegre |                 |                       |                       |
| Caroline                          | Fachini     |         |          | Hospital Santa Rita – Santa Casa de Porto Alegre |                 |                       |                       |
| André P.                          | Torelly     |         |          | Hospital Santa Rita – Santa Casa de Porto Alegre |                 |                       |                       |
| Alldren                           | Souza       |         |          | Hospital Santa Rita – Santa Casa de Porto Alegre |                 |                       |                       |
| Fábio H.                          | Lacerda     |         |          | Hospital da Luz                                  |                 |                       |                       |
| Eliana V. N.                      | Martins     |         |          | Hospital da Luz                                  |                 |                       |                       |
| Bruno A.M.P.                      | Besen       |         |          | Hospital da Luz                                  |                 |                       |                       |
| Carlos E.                         | Brandão     |         |          | Hospital da Luz                                  |                 |                       |                       |
| Péricles                          | Duarte      |         |          | Hospital Universitário de Cascavel               |                 |                       |                       |
| João M.                           | Silva       | Junior  |          | Hospital do Servidor Público Estadual            |                 |                       |                       |
| Flávio W.F.                       | Melo        | Junior  |          | Hospital do Servidor Público Estadual            |                 |                       |                       |
| Flávio A.                         | dos Santos  |         |          | Hospital do Servidor Público Estadual            |                 |                       |                       |
| João M.                           | Silva       | Junior  |          | Hospital do Servidor Público Estadual            |                 |                       |                       |
| Israel S.                         | Maia        |         |          | Hospital Nereu Ramos                             |                 |                       |                       |
| Cássio L.                         | Zandonai    |         |          | Hospital Nereu Ramos                             |                 |                       |                       |
| Eduardo                           | Berbigier   |         |          | Hospital Nereu Ramos                             |                 |                       |                       |
| Cíntia M.C.                       | Grion       |         |          | Hospital Universitário de Londrina               |                 |                       |                       |
| Josiane                           | Festti      |         |          | Hospital Universitário de Londrina               |                 |                       |                       |
| Ana Luiza                         | Mezzaroba   |         |          | Hospital Universitário de Londrina               |                 |                       |                       |
| José                              | Andrade     |         |          | Hospital Geral de Vitória da Conquista           |                 |                       |                       |
| Marianne S.                       | Camargo     |         |          | Hospital Geral de Vitória da Conquista           |                 |                       |                       |
| Adriano F.                        | Teixeira    |         |          | Hospital Geral de Vitória da Conquista           |                 |                       |                       |
| José de S.                        | Andrade     | Neto    |          | Hospital Geral de Vitória da Conquista           |                 |                       |                       |
| Michele M.G.                      | de Godoy    |         |          | Hospital das Clínicas Universidade Federal de    |                 |                       |                       |
| Andréia de F. T.                  | de Mendonça |         |          | Hospital das Clínicas Universidade Federal de    |                 |                       |                       |
| Mara L.F.S.                       | Mendes      |         |          | Hospital das Clínicas Universidade Federal de    |                 |                       |                       |
| Renata C.I.C.                     | Beltrão     |         |          | Hospital das Clínicas Universidade Federal de    |                 |                       |                       |
| Edson                             | Romano      |         |          | HCor                                             |                 |                       |                       |
| Marcelo L.P.                      | Romano      |         |          | HCor                                             |                 |                       |                       |
| Andre F.                          | Costa       |         |          | HCor                                             |                 |                       |                       |
| Jorge                             | Farran      |         |          | HCor                                             |                 |                       |                       |
| Felipe                            | Dal-Pizzol  |         |          | Hospital São José                                |                 |                       |                       |
| Danusa                            | Damásio     |         |          | Hospital São José                                |                 |                       |                       |
| Renata                            | Gonçalves   |         |          | Hospital São José                                |                 |                       |                       |
| Émerson B.                        | da Silva    |         |          | Hospital Geral de Caxias do Sul                  |                 |                       |                       |
| Luiz de F.                        | Ferreira    |         |          | Hospital Geral de Caxias do Sul                  |                 |                       |                       |
| Rafael L.                         | da Costa    |         |          | Hospital Geral de Caxias do Sul                  |                 |                       |                       |
| Kellen                            | Lopes       |         |          | Hospital Geral de Caxias do Sul                  |                 |                       |                       |
| Miquéias M.L.                     | Silva       |         |          | Hospital SAMUR                                   |                 |                       |                       |
| Douglas L.A.B.                    | de Matos    |         |          | Hospital SAMUR                                   |                 |                       |                       |
| Renata de A.                      | Marques     |         |          | Hospital SAMUR                                   |                 |                       |                       |
| Glauco A.                         | Westphal    |         |          | Centro Hospitalar UNIMED Joinville               |                 |                       |                       |

\*Indicates required information. Only first name, last name, and suffix will appear in PubMed.

| *First Name and Middle Initial(s) | *Last Name  | *Suffix | Academic | Institution                                        | Location (city, | Role or Contribution, | Group (if more than 1 |
|-----------------------------------|-------------|---------|----------|----------------------------------------------------|-----------------|-----------------------|-----------------------|
| Miriam C.                         | Machado     |         |          | Centro Hospitalar UNIMED Joinville                 |                 |                       |                       |
| Juliano                           | Ramos       |         |          | Centro Hospitalar UNIMED Joinville                 |                 |                       |                       |
| Luiz M.S.                         | Malbouisson |         |          | Hospital das Clinicas FMUSP-UAC                    |                 |                       |                       |
| Bruno N.                          | Lucena      |         |          | Hospital das Clinicas FMUSP-UAC                    |                 |                       |                       |
| Marlus M.                         | Thompson    |         |          | Hospital Evangélico Cachoeiro do Itapemirim        |                 |                       |                       |
| Juliano                           | Ramos       |         |          | Hospital Evangélico Cachoeiro do Itapemirim        |                 |                       |                       |
| Lanese M.                         | Figueiredo  |         |          | Hospital Distrital Evandro Ayres de Moura          |                 |                       |                       |
| Luana F.                          | Mourão      |         |          | Hospital Distrital Evandro Ayres de Moura          |                 |                       |                       |
| Thiago S.                         | Garces      |         |          | Hospital Distrital Evandro Ayres de Moura          |                 |                       |                       |
| Israel da S.                      | Maia        |         |          | Hospital Baía Sul                                  |                 |                       |                       |
| Jaqueline F.                      | Rohr        |         |          | Hospital Baía Sul                                  |                 |                       |                       |
| Fernanda                          | Fontanela   |         |          | Hospital Baía Sul                                  |                 |                       |                       |
| Cassia P. B.                      | Martins     |         |          | Hospital Baía Sul                                  |                 |                       |                       |
| Álvaro                            | Rea         | Neto    |          | Instituto de Neurologia de Curitiba                |                 |                       |                       |
| Fernanda                          | Reese       |         |          | Instituto de Neurologia de Curitiba                |                 |                       |                       |
| Mirella                           | Oliveira    |         |          | Instituto de Neurologia de Curitiba                |                 |                       |                       |
| André L. N.                       | Gobatto     |         |          | Hospital da Cidade                                 |                 |                       |                       |
| Luciana S.                        | de Mattos   |         |          | Hospital da Cidade                                 |                 |                       |                       |
| Caroline B.                       | de Oliveira |         |          | Hospital da Cidade                                 |                 |                       |                       |
| Meton S.                          | de Alencar  | Filho   |          | Hospital e Maternidade São Vicente                 |                 |                       |                       |
| Jussara A.                        | Arraes      |         |          | Hospital e Maternidade São Vicente                 |                 |                       |                       |
| João G.T.                         | Alves       |         |          | Hospital e Maternidade São Vicente                 |                 |                       |                       |
| Thiago C.                         | De Moraes   |         |          | Hospital e Maternidade São Vicente                 |                 |                       |                       |
| Antônio A. P.                     | Fagundes    | Jr      |          | Hospital Home                                      |                 |                       |                       |
| Roberta T.                        | Tallarico   |         |          | Hospital Home                                      |                 |                       |                       |
| Thais                             | Coutinho    |         |          | Hospital Home                                      |                 |                       |                       |
| Ronald                            | Torres      |         |          | Hospital Home                                      |                 |                       |                       |
| Fernando J.S.                     | Ramos       |         |          | BP Mirante                                         |                 |                       |                       |
| Fernanda C.                       | Athalla     |         |          | BP Mirante                                         |                 |                       |                       |
| Mauricio H.C.                     | dos Santos  |         |          | BP Mirante                                         |                 |                       |                       |
| Paulo M.G.                        | Nose        |         |          | BP Mirante                                         |                 |                       |                       |
| Cássia R.                         | Shinotsuka  |         |          | Instituto Estadual do Cérebro Paulo Neiemeyer      |                 |                       |                       |
| Pedro                             | Kurtz       |         |          | Instituto Estadual do Cérebro Paulo Neiemeyer      |                 |                       |                       |
| Bruno                             | Guimarães   |         |          | Instituto Estadual do Cérebro Paulo Neiemeyer      |                 |                       |                       |
| Luciana G.                        | Pereira     |         |          | Hospital Vila Santa Catarina                       |                 |                       |                       |
| Raquel B.                         | Jupato      |         |          | Hospital Vila Santa Catarina                       |                 |                       |                       |
| Bruno de A.                       | Bravim      |         |          | Hospital Vila Santa Catarina                       |                 |                       |                       |
| Marcos F.                         | Knibel      |         |          | Hospital São Lucas Copacabana                      |                 |                       |                       |
| Allan S.                          | da Silva    |         |          | Hospital São Lucas Copacabana                      |                 |                       |                       |
| Vinícius G.                       | de Luca     |         |          | Hospital São Lucas Copacabana                      |                 |                       |                       |
| Niklas                            | Soderberg   |         |          | Hospital das Clínicas FMUSP-UTI Ortopedia e Trauma |                 |                       |                       |
| Roseny dos R.                     | Rodrigues   |         |          | Hospital das Clínicas FMUSP-UTI Ortopedia e Trauma |                 |                       |                       |
| Luis E.P.                         | Pfingsten   |         |          | Hospital das Clínicas FMUSP-UTI Ortopedia e Trauma |                 |                       |                       |
| Cassiano                          | Teixeira    |         |          | Hospital Moinhos de Vento                          |                 |                       |                       |
| José H.D.                         | Barth       |         |          | Hospital Moinhos de Vento                          |                 |                       |                       |

\*Indicates required information. Only first name, last name, and suffix will appear in PubMed.

| *First Name and Middle Initial(s) | *Last Name  | *Suffix | Academic | Institution                               | Location (city, | Role or Contribution, | Group (if more than 1 |
|-----------------------------------|-------------|---------|----------|-------------------------------------------|-----------------|-----------------------|-----------------------|
| Giselle C.                        | Pratini     |         |          | Hospital Moinhos de Vento                 |                 |                       |                       |
| Luiz                              | Dalfior     | Junior  |          | Hospital Santa Marcelina                  |                 |                       |                       |
| Márcio H.                         | Kai         |         |          | Hospital Santa Marcelina                  |                 |                       |                       |
| Sérgio                            | Blecher     |         |          | Hospital Santa Marcelina                  |                 |                       |                       |
| Hugo C. A.                        | Urbano      |         |          | Hospital Vila da Serra                    |                 |                       |                       |
| Lucas L.                          | Carvalho    |         |          | Hospital Vila da Serra                    |                 |                       |                       |
| Danielle C. A.                    | Moreira     |         |          | Hospital Vila da Serra                    |                 |                       |                       |
| Ana L. S.                         | Bernardes   |         |          | Hospital Vila da Serra                    |                 |                       |                       |
| Vandack A.                        | Nobre       | Júnior  |          | Hospital da Clínicas UFMG                 |                 |                       |                       |
| Paula F.                          | Vassallo    |         |          | Hospital da Clínicas UFMG                 |                 |                       |                       |
| Cecília G.                        | Ravetti     |         |          | Hospital da Clínicas UFMG                 |                 |                       |                       |
| Ho Y.                             | Li          |         |          | Hospital das Clínicas FMUSP-UTI MI        |                 |                       |                       |
| Vivian V. T.                      | Sales       |         |          | Hospital das Clínicas FMUSP-UTI MI        |                 |                       |                       |
| Renata                            | Guazzelli   |         |          | Hospital das Clínicas FMUSP-UTI MI        |                 |                       |                       |
| Álvaro                            | Rea         | Neto    |          | Hospital Vita Batel                       |                 |                       |                       |
| Rafael D.                         | de Oliveira |         |          | Hospital Vita Batel                       |                 |                       |                       |
| Leandro                           | Pozzo       |         |          | Hospital Vita Batel                       |                 |                       |                       |
| Leandro U.                        | Taniguchi   |         |          | Hospital das Clínicas FMUSP-UTI PSM       |                 |                       |                       |
| Pedro V.                          | Mendes      |         |          | Hospital das Clínicas FMUSP-UTI PSM       |                 |                       |                       |
| Bruno A. M. P.                    | Besen       |         |          | Hospital das Clínicas FMUSP-UTI PSM       |                 |                       |                       |
| Suzana M. A.                      | Lobo        |         |          | Hospital de Base de São José do Rio Preto |                 |                       |                       |
| Miriam                            | Machado     |         |          | Hospital Dona Helena                      |                 |                       |                       |
| Ana B. B.                         | Camacho     |         |          | Hospital Dona Helena                      |                 |                       |                       |
| Pablo O.                          | Tomba       |         |          | Hospital do Câncer de Barretos – Jales    |                 |                       |                       |
| Fred C. T.                        | Lizidatti   |         |          | Hospital do Câncer de Barretos – Jales    |                 |                       |                       |
| Walter C. G.                      | Baptista    |         |          | Hospital Novo Atibaia                     |                 |                       |                       |
| Aline R.                          | Moreira     |         |          | Hospital Novo Atibaia                     |                 |                       |                       |
| Manoela M.                        | de Sousa    |         |          | Hospital Novo Atibaia                     |                 |                       |                       |
| Marcelo O.                        | Santos      |         |          | Hospital de Clínicas UFPR                 |                 |                       |                       |
| Karla                             | Moretto     |         |          | Hospital de Clínicas UFPR                 |                 |                       |                       |
| Priscilla A.                      | de Martins  |         |          | Hospital Evangélico de Vila Velha         |                 |                       |                       |
| Liz M. L.                         | de Souza    |         |          | Hospital Evangélico de Vila Velha         |                 |                       |                       |
| Thiago R.                         | Sequeira    |         |          | Hospital Evangélico de Vila Velha         |                 |                       |                       |
| Manoel M. S.                      | Pedrinha    |         |          | Hospital Evangélico de Vila Velha         |                 |                       |                       |
| Marcone L. S.                     | da Rocha    |         |          | Hospital São João de Deus                 |                 |                       |                       |
| Francisco R. V.                   | Saleiro     |         |          | Hospital São João de Deus                 |                 |                       |                       |
| Tatiana M.                        | Clementino  |         |          | Hospital São João de Deus                 |                 |                       |                       |
| Hélio P.                          | Guimarães   |         |          | Hospital São Paulo UTI- Clínica Médica    |                 |                       |                       |
| Marcos C. R.                      | Mello       |         |          | Hospital São Paulo UTI- Clínica Médica    |                 |                       |                       |
| Mirella C.                        | de Oliveira |         |          | Hospital do Trabalhador                   |                 |                       |                       |
| Fernanda B.                       | Reese       |         |          | Hospital do Trabalhador                   |                 |                       |                       |
| Denise M.                         | Ferreira    |         |          | Hospital das Clínicas da UFG              |                 |                       |                       |
| Fernanda A. F.                    | Gonçalves   |         |          | Hospital das Clínicas da UFG              |                 |                       |                       |
| Luiz M. S.                        | Malbouisson |         |          | Hospital das Clínicas FMUSP-UTI Trauma    |                 |                       |                       |
| Roberta M. L.                     | Roepke      |         |          | Hospital das Clínicas FMUSP-UTI Trauma    |                 |                       |                       |

## Supplemental Online Content: Nonauthor Collaborators

\*Indicates required information. Only first name, last name, and suffix will appear in PubMed.

| *First Name and Middle Initial(s) | *Last Name | *Suffix | Academic | Institution                            | Location (city, | Role or Contribution, | Group (if more than 1 |
|-----------------------------------|------------|---------|----------|----------------------------------------|-----------------|-----------------------|-----------------------|
| Bruno M.                          | Tomazini   |         |          | Hospital das Clínicas FMUSP-UTI Trauma |                 |                       |                       |
| Sidiner M.                        | Vaz        |         |          | Casa de Caridade de Carangola          |                 |                       |                       |
| Miria Bonjour                     | Laviola    |         |          | Casa de Caridade de Carangola          |                 |                       |                       |
| Thiago D.                         | Correa     |         |          | Hospital Municipal do M'Boi Mirim      |                 |                       |                       |
| Roger M.                          | Alencar    |         |          | Hospital Municipal do M'Boi Mirim      |                 |                       |                       |
| Denise N.                         | Freitas    |         |          | Hospital Municipal do M'Boi Mirim      |                 |                       |                       |
| Heitor P.                         | Póvoas     | Filho   |          | Hospital de Ilheus                     |                 |                       |                       |
| Liliane B. S.                     | Passos     |         |          | Hospital das Clinicas de Uberlândia    |                 |                       |                       |
| Juliane de M.                     | Silva      |         |          | Hospital das Clinicas de Uberlândia    |                 |                       |                       |
