# Supplementary material
Source: PubMed Central journal article supplement (PMC8356145)
Supplement: jama-e2111444-s005.pdf [file jama-e2111444-s005.pdf]

# Data Sharing Statement

Zampieri. Effect of Slower vs Faster Intravenous Fluid Bolus Rates on Mortality in Critically Ill Patients. *JAMA*. Published August 10, 2021. doi:10.1001/jama.2021.11444

## Data

**Data available:** Yes

**Data types:** Deidentified participant data

**How to access data:** Anonymized data is available upon reasonable request including a short study protocol. The steering committee will evaluate all requests. Please note that Brazilian regulatory agencies approval is also required.

**When available:** beginning date: 01-31-2022

## Supporting Documents

**Document types:** Statistical/analytic code, Informed consent form

**How to access documents:** Anonymized data is available upon reasonable request including a short study protocol. The steering committee will evaluate all requests. Please note that Brazilian regulatory agencies approval is also required.

**When available:** With publication

## Additional Information

**Who can access the data:** Anonymized data is available upon reasonable request including a short study protocol. The steering committee will evaluate all requests. Please note that Brazilian regulatory agencies approval is also required.

**Types of analyses:** Anonymized data is available upon reasonable request including a short study protocol. The steering committee will evaluate all requests. Please note that Brazilian regulatory agencies approval is also required.

**Mechanisms of data availability:** Anonymized data is available upon reasonable request including a short study protocol. The steering committee will evaluate all requests. Please note that Brazilian regulatory agencies approval is also required.
